# Supplementary material
Source: Springer Nature journal article supplement (https://www.springermedizin.de/resource/supplementary/12911_2007_167_MOESM4_ESM.pdf/9527284)

LR model

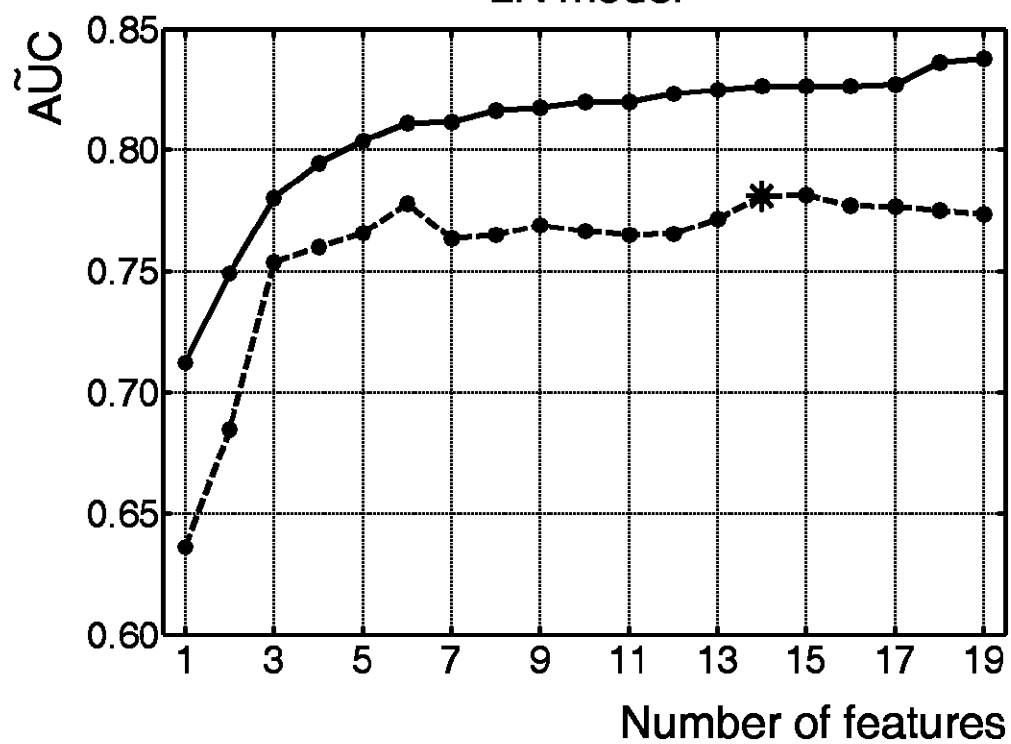

Supplement: MOESM4 [file 9527284]
